# Supplementary material
Source: ML conference proceedings conference paper supplement (https://openreview.net/forum?id=5XwylUAmnY)
Supplement: supplementary_material [file attachment]

(a) GNN-based Feature Completion Module

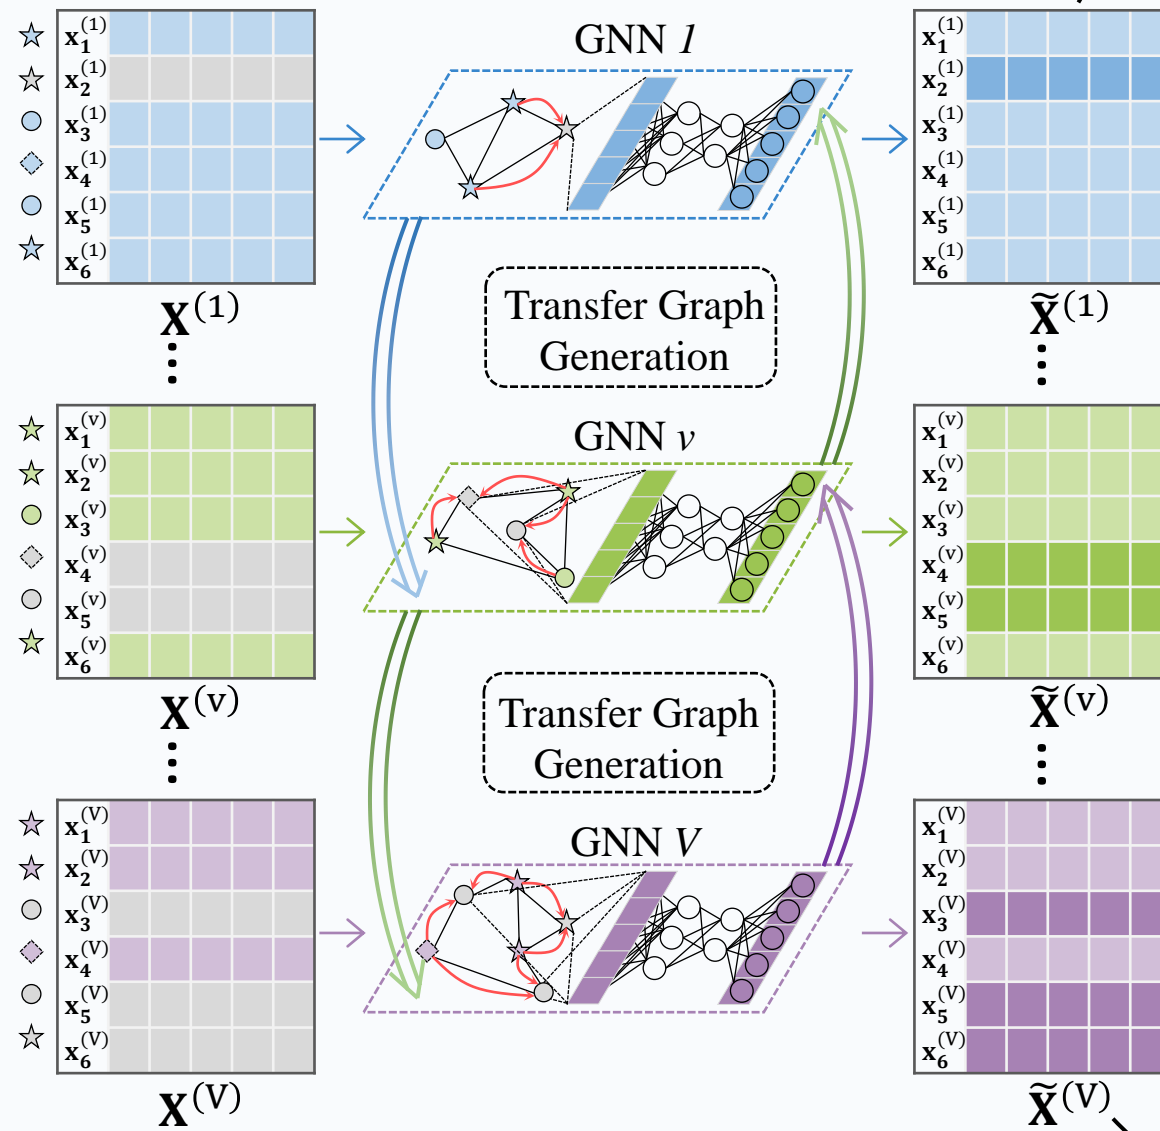

(b) Multi-view Representation Learning Module

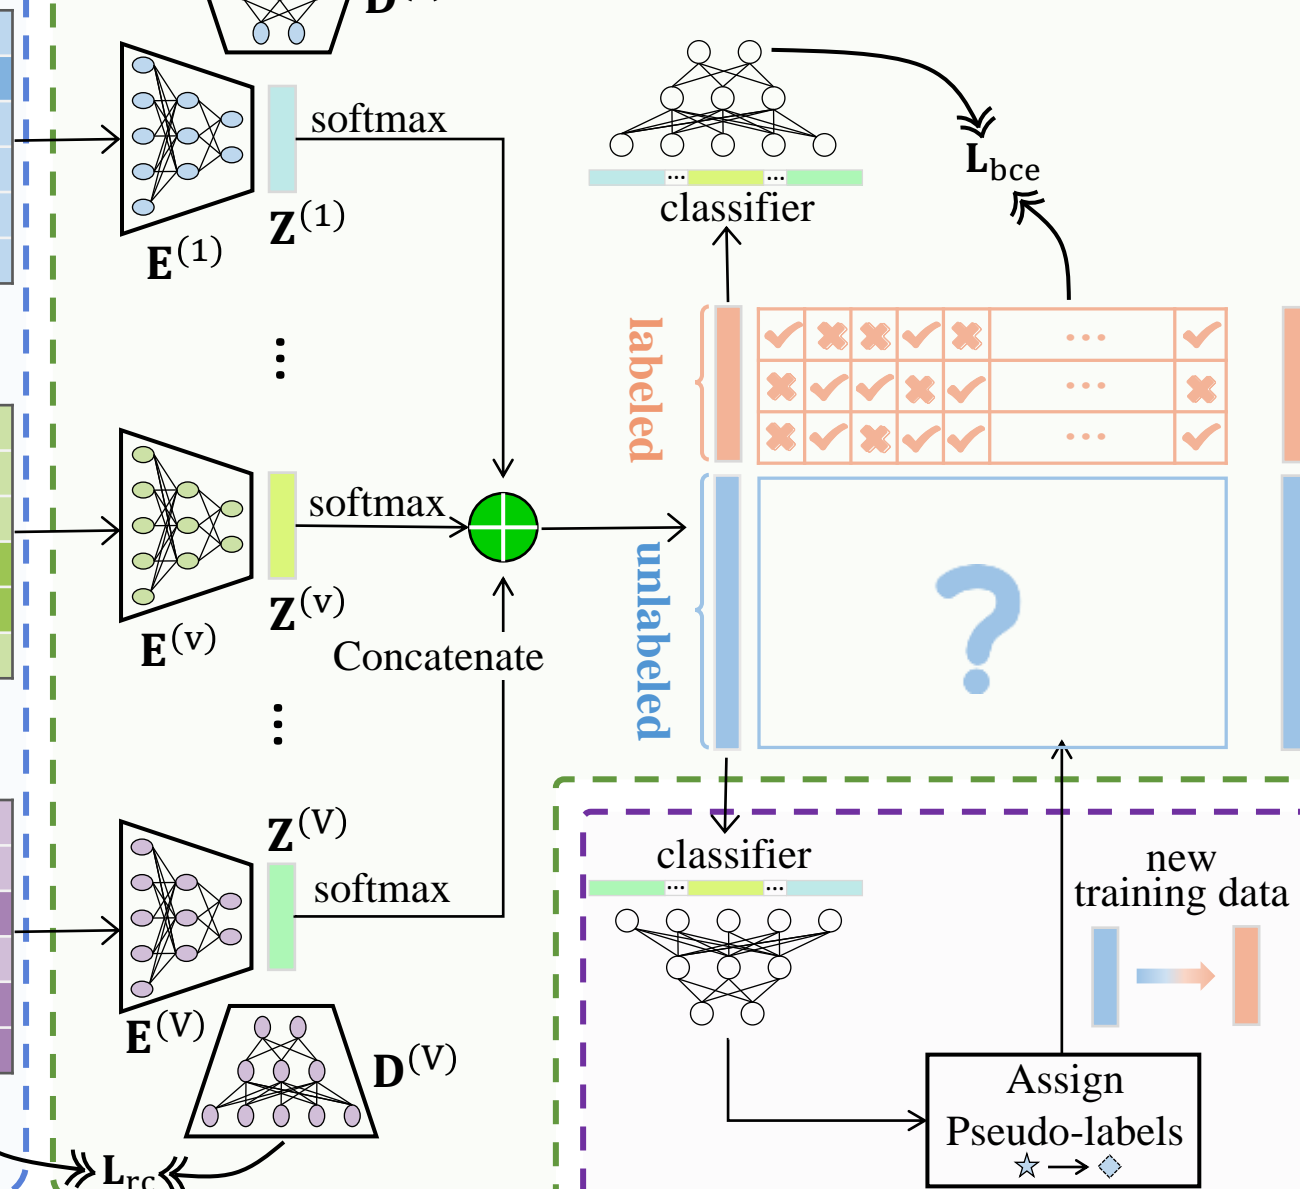

(c) Safe Semi-supervised Learning Module

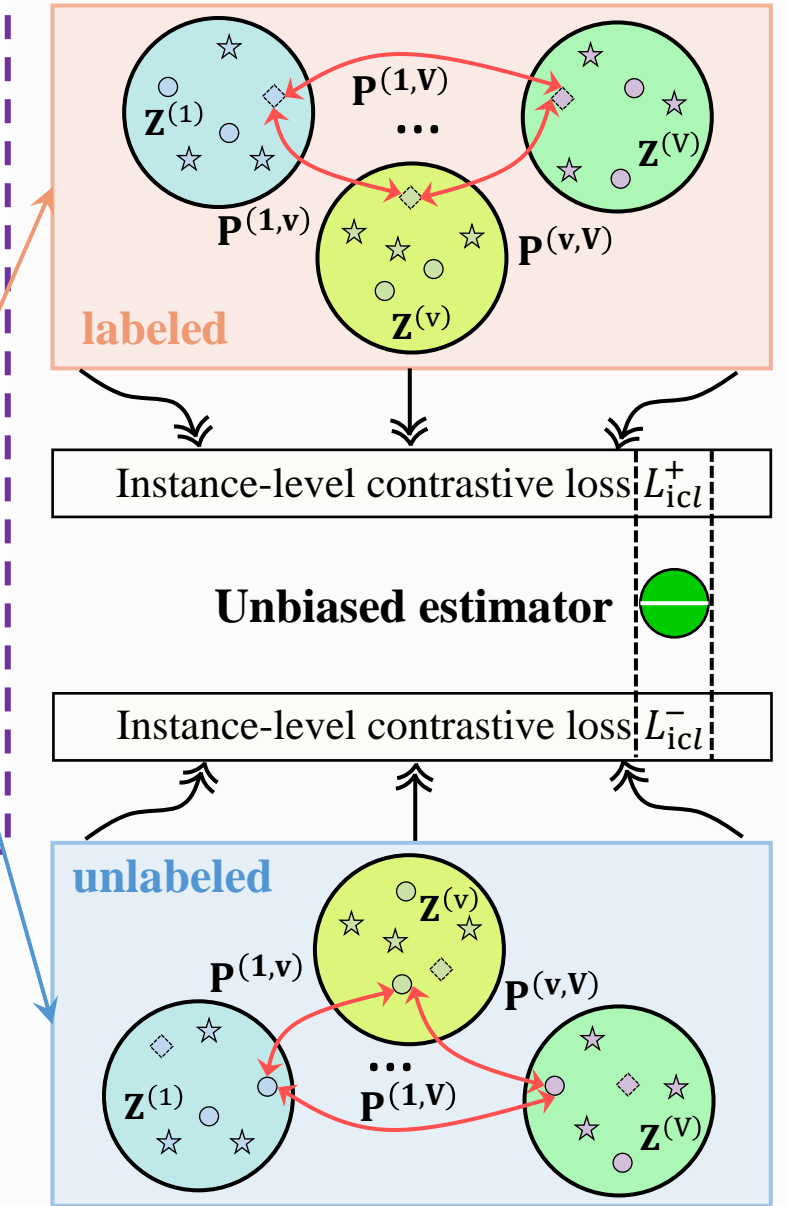

Unlabeled missing instance  $\diamond$  Labeled missing instance  $\star \circ$  Unlabeled existing instance  $\diamond \diamond$  Labeled existing instance  $\star \star \circ \circ \star$  Propagation  $\leftarrow$  Loss  $\ll$
