# Supplementary material
Source: ML conference proceedings conference paper supplement (https://openreview.net/forum?id=5XwylUAmnY)
Supplement: supplementary_material [file attachment]

# Incomplete Multi View

# Semi-Supervised Multi-Label

Labeled

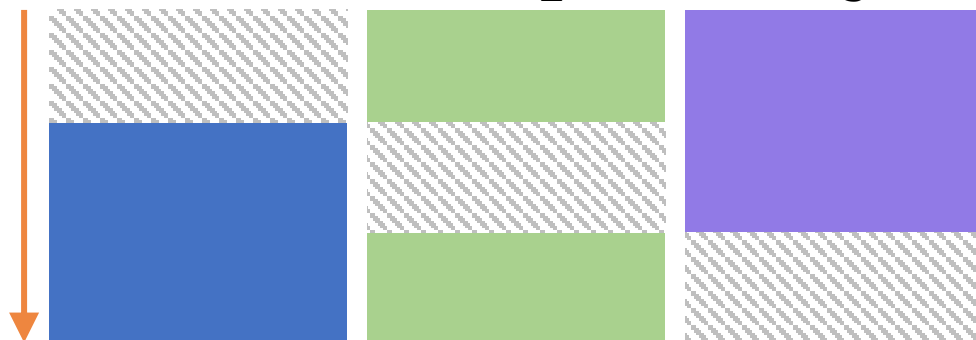

| $L_1$ | $L_2$ | $L_3$ | $L_4$ | ... | $L_C$ |
|-------|-------|-------|-------|-----|-------|
| ✓     | ✗     | ✗     | ✓     | ... | ✓     |
| ✗     | ✓     | ✓     | ✗     | ... | ✗     |
| ✗     | ✓     | ✗     | ✓     | ... | ✓     |

Unlabeled

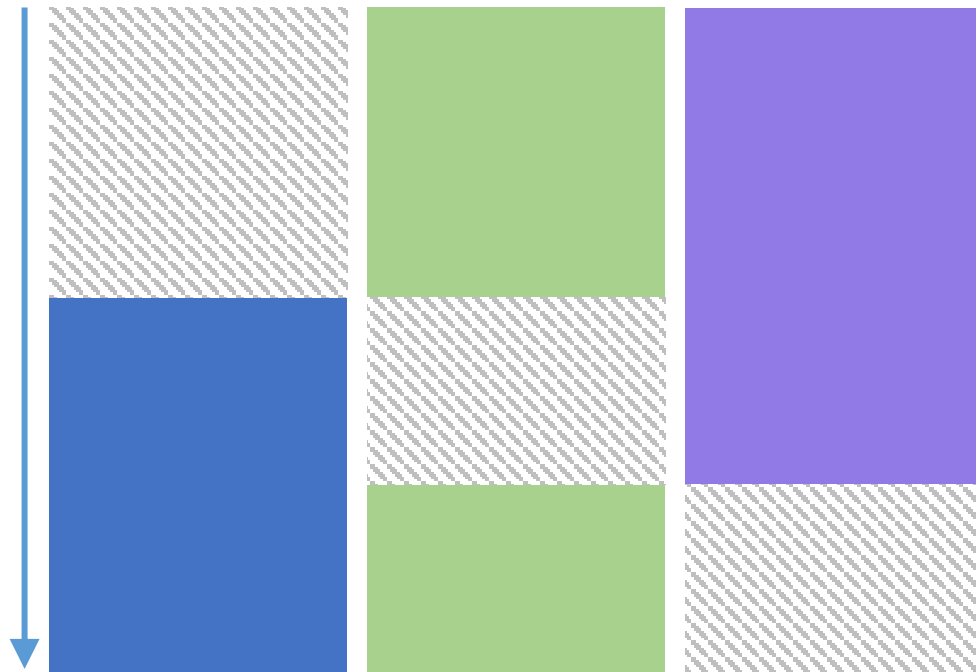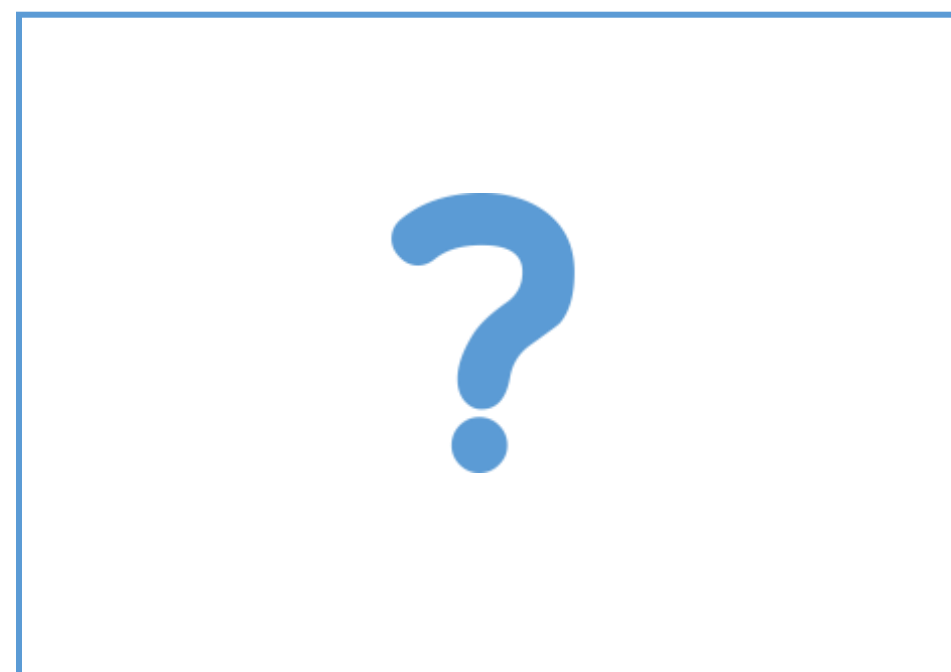

 missing views

 missing labels

 complete views

 complete labels
